# Supplementary material for: A double blind, placebo-controlled randomized comparative study on the efficacy of phytosterol-enriched and conventional saw palmetto oil in mitigating benign prostate hyperplasia and androgen deficiency
Source: PubMed Central journal article supplement (PMC7333342; doi:10.1186/s12894-020-00648-9), 2020-07-03
Supplement: 12894_2020_648_MOESM2_ESM.pdf [file 12894_2020_648_MOESM2_ESM.pdf]

## Power and Sample Size Determination

Assuming the mean difference for all groups 2.35 between **VISPO**, **SPO** and **placebo** and standard deviation 2.45, and approximately 33 subjects randomized to each treatments, this study will have 80% power at the level of 0.05 (2-sided) using a **One-way ANOVA between groups**. This is considered for comparing three treatment groups on a measurement outcome variable through the ANOVA. To allow for an estimated 12% potential dropout rate, this study plans to enroll approximately 99 subjects to ensure that at least 87 to complete. The assumed effect size is based on differences measured between **VISPO**, **SPO** and **placebo** in previous studies conducted with similar drug formulations in male subjects.

```
ss.1way(k=3, alpha=0.05, beta=0.1, delta=2.35, sigma=2.45, B=100)
```

```
Balanced one-way analysis of variance sample size adjustment
```

```
      k = 3  
sig.level = 0.05  
power = 0.9  
      n = 29
```

NOTE: n is number in each group, total sample = 87

A total of  $N=87$ , number of subjects are required in the end of the study with all the data being complete for analysis, but a proportion ( $q=0.12$ ) are expected to drop out before the study ends. In this case, the following total number of subjects ( $N1$ ) would have to be enrolled to ensure that the final sample size ( $N$ ) is achieved:

$$N1 = \frac{N}{1 - q} = \frac{87}{(1 - 0.12)} = 99$$

Where  $q$  is the proportion of attrition and is generally 12% in this type of studies.
